# Supplementary material for: Aggregates Associated with Instability of Antibodies during Aerosolization Induce Adverse Immunological Effects
Source: MDPI journal article supplement (doi:10.3390/pharmaceutics14030671), 2022-03-18
Supplement: s1 [file s1]

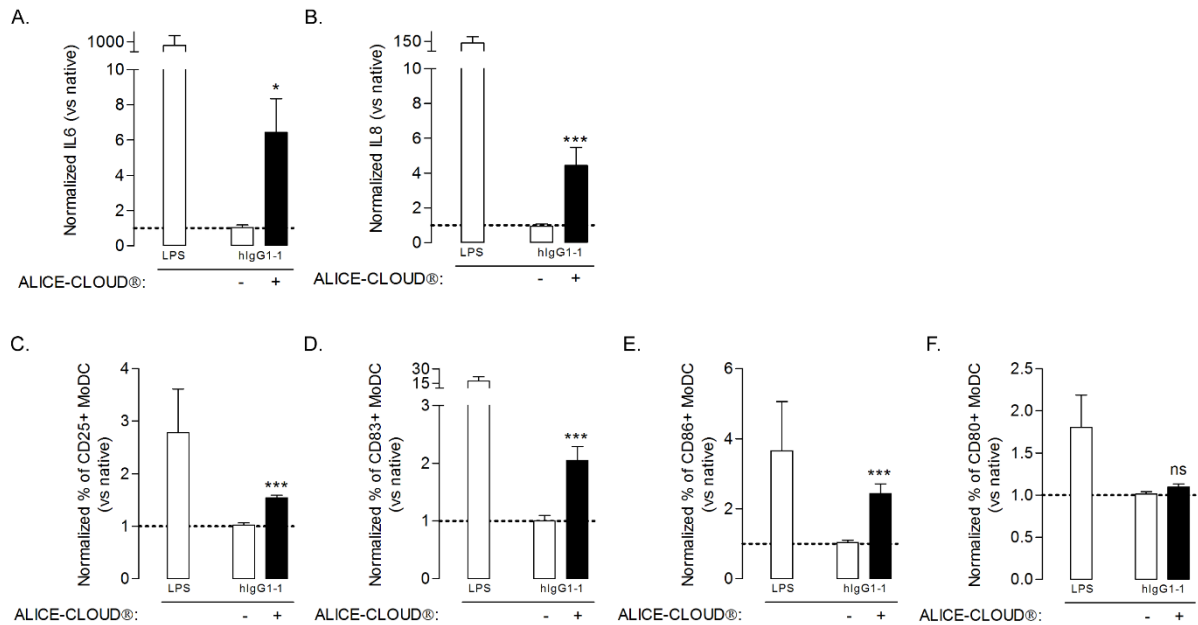

**Supplementary Figure S1:** MoDC were stimulated using equal final concentration of hlgG1-1 at 100 µg/mL either native (white bars) or nebulized (black bars) using the VITROCELL Cloud 12 system. IL6 (A) and IL8 (B) were quantified in cell-free supernatant after 18h. CD25 (E), CD83 (F), CD86 (G), CD80 (H) expression was measured using flow cytometry after 18h. The data are quoted as the mean ± SEM. \*, \*\*\* :  $p < 0.05$  and  $p < 0.001$  respectively, in a  $t$ -test. The results are representative of three independent experiments ( $n=3-6$ /experiment).

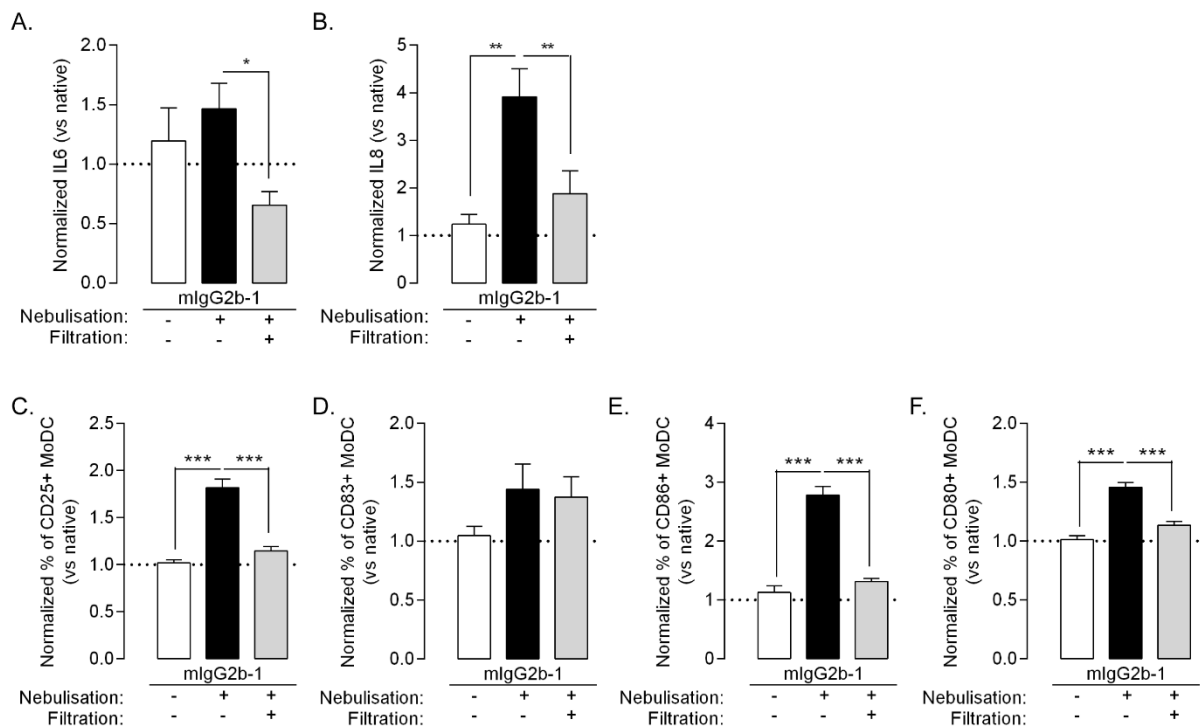

**Supplementary Figure S2:** mlgG2b-1 and mlgG2b-2 were either nebulized and subsequently collected using an Aeroneb Pro™ vibrating-mesh nebulizer (black bars) and further 0.45µm-filtered (gray bars) or left untreated (white bars). (MoDC were stimulated using 100 µg/mL of mlgG2b-1 for 18 hours. IL6 (A)

and IL8 (B) were quantified in cell-free supernatant. CD25 (C), CD83 (D), CD86 (E), CD80 (F) expression were measured using flow cytometry. The data are quoted as the mean  $\pm$  SEM. \*, \*\*, \*\*\* :  $p<0.05$ ,  $p<0.01$  and  $p<0.001$  respectively, in a one-way ANOVA with Newman-Keuls's correction for multiple comparisons. The results are representative of three independent experiments (n=3-6/experiment).

Broncho-alveolar lavage:

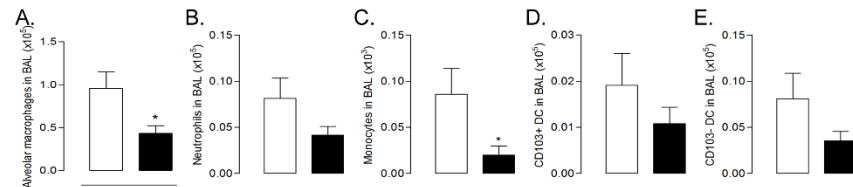

Lung:

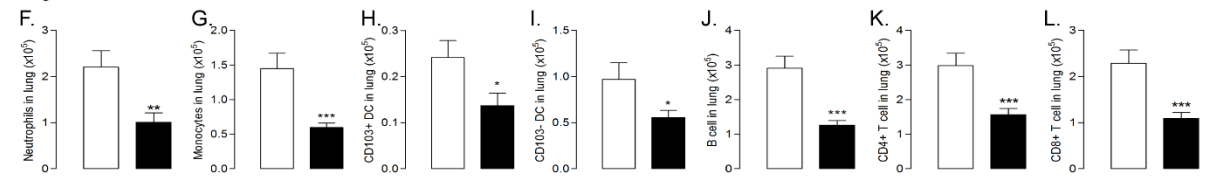

Spleen:

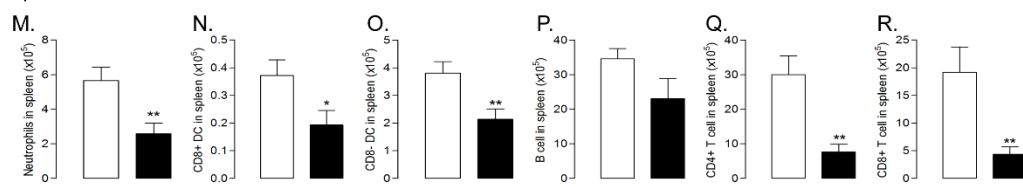

**Supplementary Figure S3:** C57/BL6jRj mice received a 40  $\mu$ L orotracheal instillation of mIgG2b-1 at 100  $\mu$ g/mL either native (white bars) or nebulized (black bars). The total number of alveolar macrophages (A), neutrophils (B, F and M), monocytes (C and G), CD103+ dendritic cells (D and H), CD103- dendritic cells (E and I), B cells (J and P), CD8+ dendritic cells (N), CD8- dendritic cells (O), CD4+ T cells (K and Q) and CD8+ T cells (L and R) were quantified in BAL (A to E), in the lungs (F to L) and the spleen (M to R) using flow cytometry, 18h after the administration. The data are quoted as the mean  $\pm$  SEM. \*, \*\*\* :  $p<0.05$  and  $p<0.001$  respectively, in a one-way ANOVA with  $t$ -test. The results are representative of three experiment (n=5/experiments).

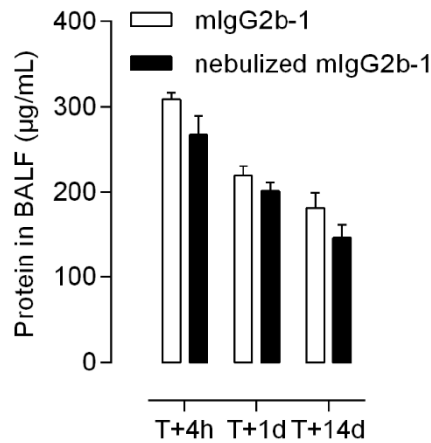

**Supplementary Figure S4:** C57/BL6jRj mice received a 40 µL orotracheal instillation of mIgG2b-1 at 100 µg/mL either native (white bars) or nebulized (black bars). The concentration of protein in BALF was determined 4 hours, 18 hours and 14 days after the administration. The data are quoted as the mean  $\pm$  SEM. The results are representative of one experiment (n=5) for 4 hours and 14 days, and representative of three experiments (n=5/experiments) for 18 hours.

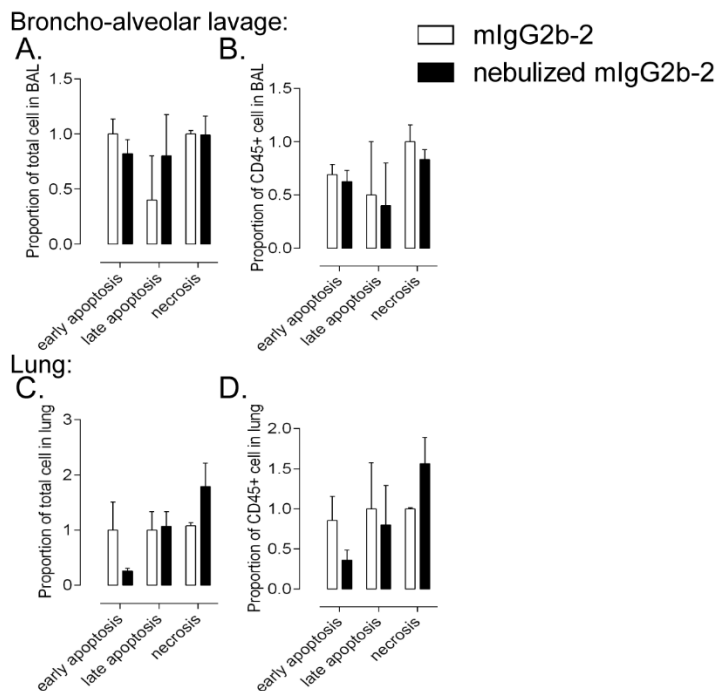

**Supplementary Figure S5:** C57/BL6jRj mice received a 40 µL orotracheal instillation of mIgG2b2-2 at 100 µg/mL either native (white bars) or nebulized (black bars). The proportion of early apoptotic cells (Annexin-V+/PI-), late apoptotic cells (Annexin-V+/PI+) and necrotic cells (Annexin-V-/PI+) were quantified in total cell (A and C) or CD45+ cell (B and D), 18h after the administration in BAL (A and B) and lungs (C and D) using flow cytometry. The data are quoted as the mean  $\pm$  SEM. The results are from two experiments (n=5/experiments).

# Broncho-alveolar lavage:

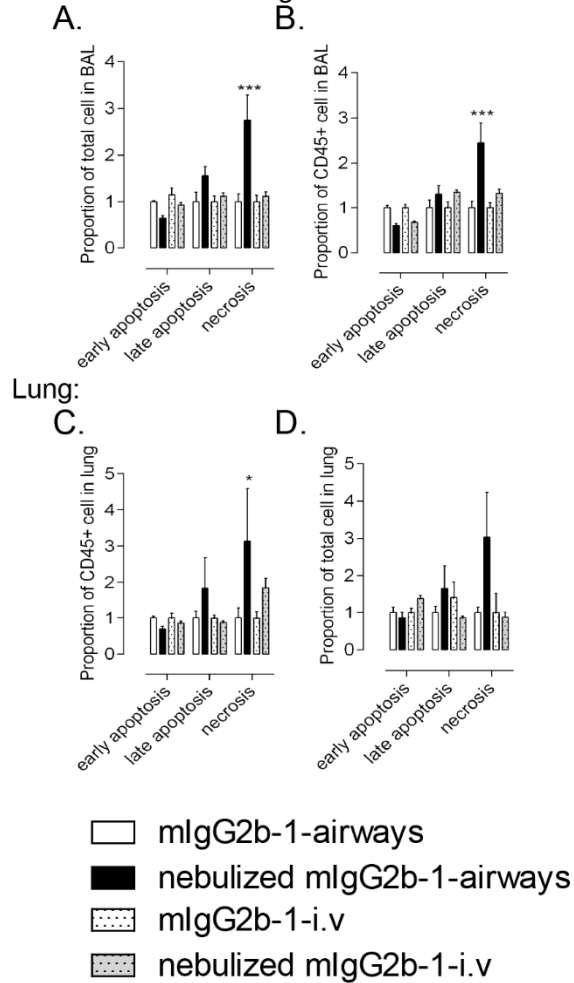

Supplementary Figure S6: C57/BL6jRj mice received a 40  $\mu$ L orotracheal instillation of mlg2b-1 at 100  $\mu$ g/mL either native (white bars) or nebulized (black bars) through the airways or through intravenous injection at D+0, D+7, D+14, D+21 and D+28. The total number of cells (A and C) and CD45+ cells (B and D) were quantified in the BAL (A and B) and in the lungs (C and D) using flow cytometry, 18h after the last administration. The data are quoted as the mean  $\pm$  SEM. \*, \*\*:  $p < 0.05$  and  $p < 0.01$  respectively, in a one-way ANOVA with  $t$ -test. The results are representative of three experiment (n=5/experiments).

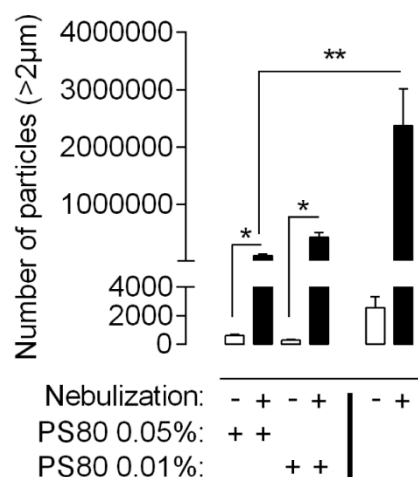

**Supplementary Figure S7:** mlgG2b-1 formulated in 1X-PBS, 1X-PBS+Polysorbate80 0.01% (PS80 0.01%) or 1X-PBS+Polysorbate80 0.05% (PS80 0.05%) was nebulized using an Aeronex Pro™ vibrating-mesh nebulizer (black bars) or left untreated (white bars) and aerosols were collected. The total number of particles (which size >2μm) was quantified using a flow microscope. The data are quoted as the mean ± SEM. \*, \*\*:  $p < 0.05$  and  $p < 0.01$  respectively, in a  $t$ -test. The results are representative of three independent nebulizations ( $n=3$ /experiment).

Lung:

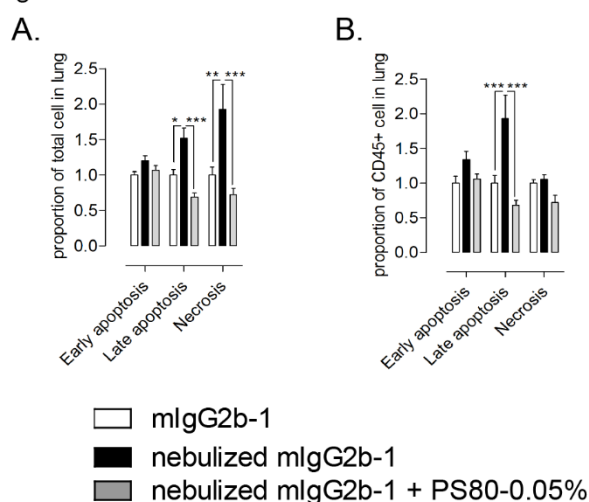

**Supplementary Figure S8:** C57/BL6jRj mice received a 40 μL orotracheal instillation of mlgG2b-1 at 100 μg/mL either native (white bars), nebulized (black bars) or nebulized + Polysorbate80 0.05% (PS80 0.05%, gray bars). The proportion of early apoptotic cells (Annexin-V+/PI-), late apoptotic cells (Annexin-V+/PI+) and necrotic cells (Annexin-V-/PI+) were quantified in total cell (A) or CD45+ cell (B) 18h after the administration in lungs using flow cytometry. The data are quoted as the mean ± SEM. \*, \*\*, \*\*\* :  $p < 0.05$ ,  $p < 0.01$  and  $p < 0.001$  respectively, in a one-way ANOVA with  $t$ -test. The results are representative of three experiment ( $n=5$ /experiments).

Supplementary Table S1:

Dynamic light scattering analysis of antibodies

| Antibody           | Radius (nm) | %mass | PD index |
|--------------------|-------------|-------|----------|
| native hlgG1-1     | 5,07        | 99,67 | 0,18     |
| nebulized hlgG1-1  | 5,25        | 99,75 | 0,02     |
| native hlgG1-2     | 5,40        | 99,90 | 0,12     |
| nebulized hlgG1-2  | 5,43        | 99,78 | 0,16     |
| native hlgG1-3     | 5,38        | 99,87 | 0,05     |
| nebulized hlgG1-3  | 5,23        | 99,90 | 0,17     |
| native mlgG2b-1    | 5,88        | 99,80 | n/a      |
| nebulized mlgG2b-1 | n/a         |       |          |
| native mlgG2b-2    | 6,30        | 99,40 | 0,37     |
| nebulized mlgG2b-2 | 7,36        | 93,06 | n/a      |

Supplementary table S2: List of antibodies used for flow cytometry

*murine*

| Target     | Fluorophore | Clone    | Supplier     |
|------------|-------------|----------|--------------|
| CD45       | APC-Cy7     | 30-F11   | Biolegend    |
| Ly6C       | Pe-Cy7      | HK1.4    | ebiosciences |
| SiglecF    | PE          | E50-2440 | BD           |
| SiglecE    | V450        | E50-2440 | BD           |
| F4/80      | Violet Blue | BM8      | Biolegend    |
| Ly6G       | FITC        | 1A8      | Biolegend    |
| CD40       | APC         | 2/23     | Biolegend    |
| CD11b      | PerCP-Cy5.5 | MT/70    | ebiosciences |
| CD11b      | Pe-Cy7      | M1/70    | Biolegend    |
| CD11b      | Pe-Cy7      | M1/70    | Biolegend    |
| CD86       | V450        | GL1      | Biolegend    |
| CD80       | FITC        | 16-10A1  | Biolegend    |
| CD11c      | PE          | N418     | ebiosciences |
| CD11c      | APC         | N418     | Biolegend    |
| IA/IE      | PerCP-EF710 | NIMR-4   | ebiosciences |
| IA/IE      | PE          | NIMR-4   | ebiosciences |
| CD4        | APC-Cy7     | GK1.5    | Biolegend    |
| CD4        | Pe-Cy7      | GK1.5    | Biolegend    |
| CD3        | PerCP-Cy5.5 | 17A2     | Biolegend    |
| CD8        | APC         | 53-6.7   | ebiosciences |
| CD8        | PerCP-Cy5.5 | 17A2     | BD           |
| CD8        | Vioblu      | 53-6.7   | ebiosciences |
| CD62L      | FITC        | MEL-14   | ebiosciences |
| CD19       | APC         | 1D3      | BD           |
| B220/CD45R | PerCP-Cy5.5 | RA3-6B2  | Biolegend    |

*human*

| Target | Fluorophore | Clone | Supplier  |
|--------|-------------|-------|-----------|
| CD45   | APC-Cy7     | 2D1   | BD        |
| CD25   | APC         | BC96  | Biolegend |
| CD80   | PE          | 2D10  | Biolegend |
| CD86   | PerCP-Cy5.5 | BU63  | Biolegend |
| CD83   | FITC        | HD15e | Biolegend |

Supplementary table S3: phenotype of analyzed cells

| Name                               | Phenotype                                         | Origin            |
|------------------------------------|---------------------------------------------------|-------------------|
| Alveolar macrophages               | CD45+ CD11c+ SiglecF+ CD11b- F4/80+               | BAL               |
| Neutrophils                        | CD45+ CD11c- SiglecF- CD11b+ Ly6G+ Ly6C- F4/80-   | BAL, Lung, Spleen |
| Monocytes                          | CD45+ CD11c- SiglecF+ CD11b+ Ly6G- Ly6C+ F4/80-   | BAL, Lung, Spleen |
| CD103+ Dendritic cells (CD103+ DC) | CD45+ CD11c+ SiglecF- CD11b- CD103+ F4/80- IA/IE+ | BAL, Lung         |
| CD103- Dendritic cells (CD103- DC) | CD45+ CD11c+ SiglecF- CD11b+ CD103- F4/80- IA/IE+ | BAL, Lung         |
| B cell                             | CD45+ CD3- CD19+                                  | Lung, Spleen      |
| CD4+ T cell                        | CD45+ CD19- CD3+ CD4+ CD8-                        | Lung, Spleen      |
| CD8+ T cell                        | CD45+ CD19- CD3+ CD4- CD8+                        | Lung, Spleen      |
| CD8a+ Dendritic cells (CD8a+ DC)   | CD45+ CD8a+ CD11c+ CD11b- MHCII+                  | Spleen            |
| CD8a- Dendritic cells (CD8a- DC)   | CD45+ CD8a- CD11c+ CD11b- MHCII+                  | Spleen            |
| Early apoptosis                    | Annexin-V+ PI-                                    | BAL, Lung, Spleen |
| Late apoptosis                     | Annexin-V+ PI+                                    | BAL, Lung, Spleen |
| Necrosis                           | Annexin-V- PI+                                    | BAL, Lung, Spleen |

Supplementary Table S4: Particle size distribution (%) of nebulized antibodies

| Antibody                        | 2-5µm | 5-25µm | >25µm |
|---------------------------------|-------|--------|-------|
| native mIgG2b-1                 | 62,1  | 37,1   | 0,8   |
| nebulized mIgG2b-1              | 71,6  | 27,6   | 0,8   |
| nebulized mIgG2b-1 + PS80-0,05% | 70,7  | 29,1   | 0,3   |
| nebulized mIgG2b-1 + 0.45µm     | 69,2  | 30,8   | 0,0   |

Supplementary Table S5: Dynamic light scattering analysis of nebulized antibodies

| Antibody                        | Radius (nm) | %mass | PD index |
|---------------------------------|-------------|-------|----------|
| native mIgG2b-1                 | 6,00        | 99,80 | 18,10    |
| nebulized mIgG2b-1              | n/a         | n/a   | n/a      |
| nebulized mIgG2b-1 + PS80-0,05% | n/a         | n/a   | n/a      |
| nebulized mIgG2b-1 + 0.45µm     | n/a         | n/a   | n/a      |

Supplementary Table S6: Nanodrop analysis of antibody concentration

|                                 | [IgG] (mg/mL) |
|---------------------------------|---------------|
| native mIgG2b-1                 | 2,8           |
| nebulized mIgG2b-1              | 2,53          |
| nebulized mIgG2b-1 + PS80-0,05% | 2,28          |
| nebulized mIgG2b-1 + 0.45µm     | 2,79          |
